# Supplementary material for: Comparison of Different Strategies for Selection/Adaptation of Mixed Microbial Cultures Able to Ferment Crude Glycerol Derived from Second-Generation Biodiesel
Source: Hindawi journal article supplement (doi:10.1155/2015/932934), 2015-01-01
Supplement: f1 [file 932934.f1.pdf]

1 SUPPLEMENTARY MATERIAL

2

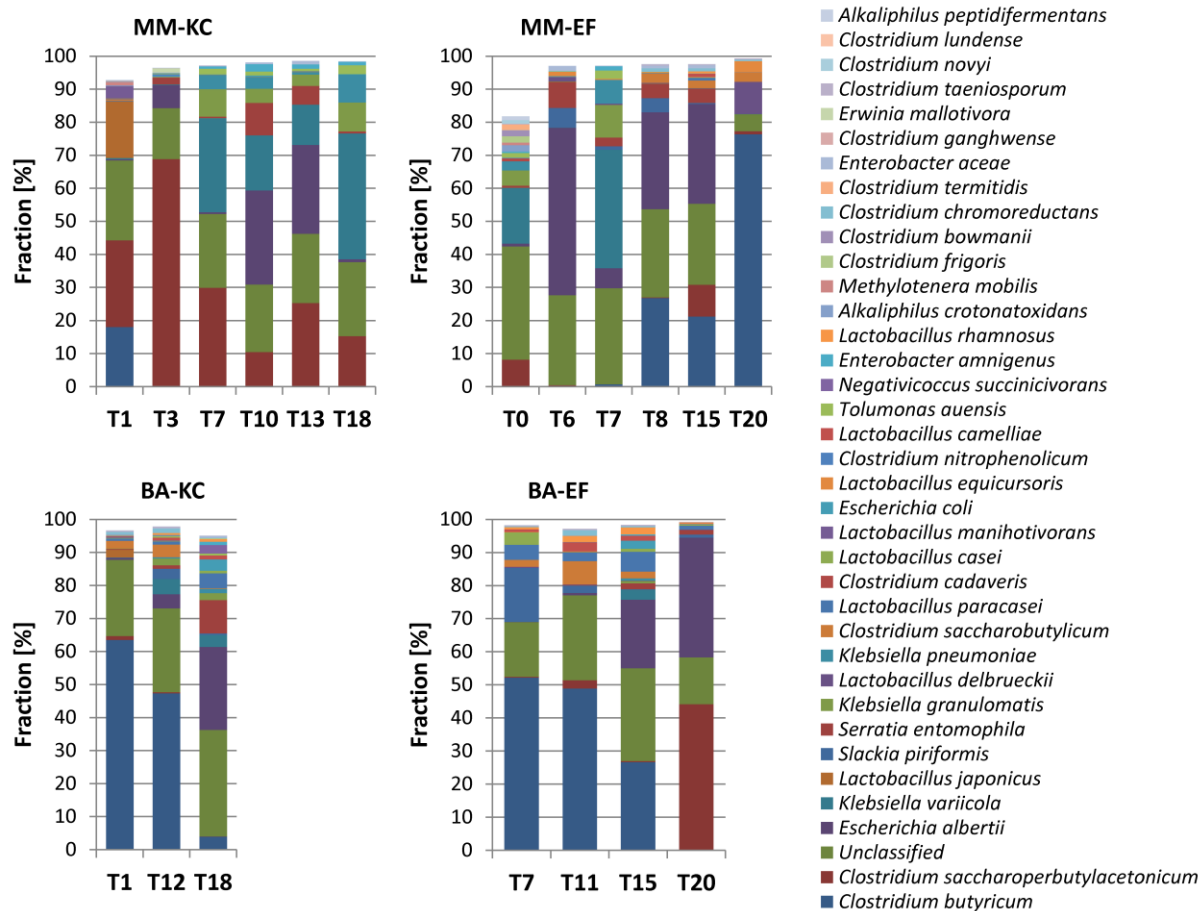

3

4 **S1.** Metagenomic classification of the MMC at the species level. Results of batch transfers, during the enrichment of  
5 activated sludge. MM-KC = Minimum Medium with Kinetic Control (21h); MM-EF = Minimum Medium with End of  
6 Fermentation (72h); BA-KC = Basal Medium with Kinetic Control (21h); BA-EF = Basal Medium with End of  
7 Fermentation (72h). T0-T20 = Transfer numbers. Species appearing at frequencies below 1% in all samples were  
8 omitted.

9

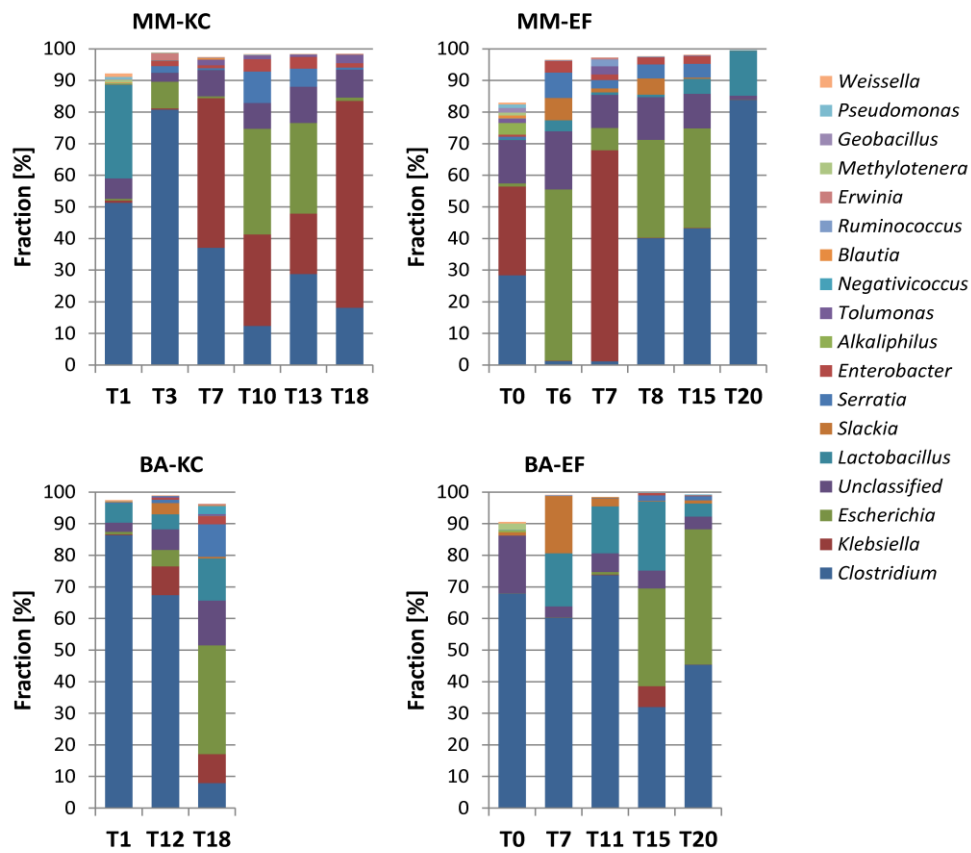

**S2.** Metagenomic classification of the MMC at the genus level. Results of batch transfers, during the enrichment of activated sludge. MM-KC = Minimum Medium with Kinetic Control (21h); MM-EF = Minimum Medium with End of Fermentation (72h); BA-KC = Basal Medium with Kinetic Control (21h); BA-EF = Basal Medium with End of Fermentation (72h). T0-T20 = Transfer numbers. Species appearing at frequencies below 1% in all samples were omitted.

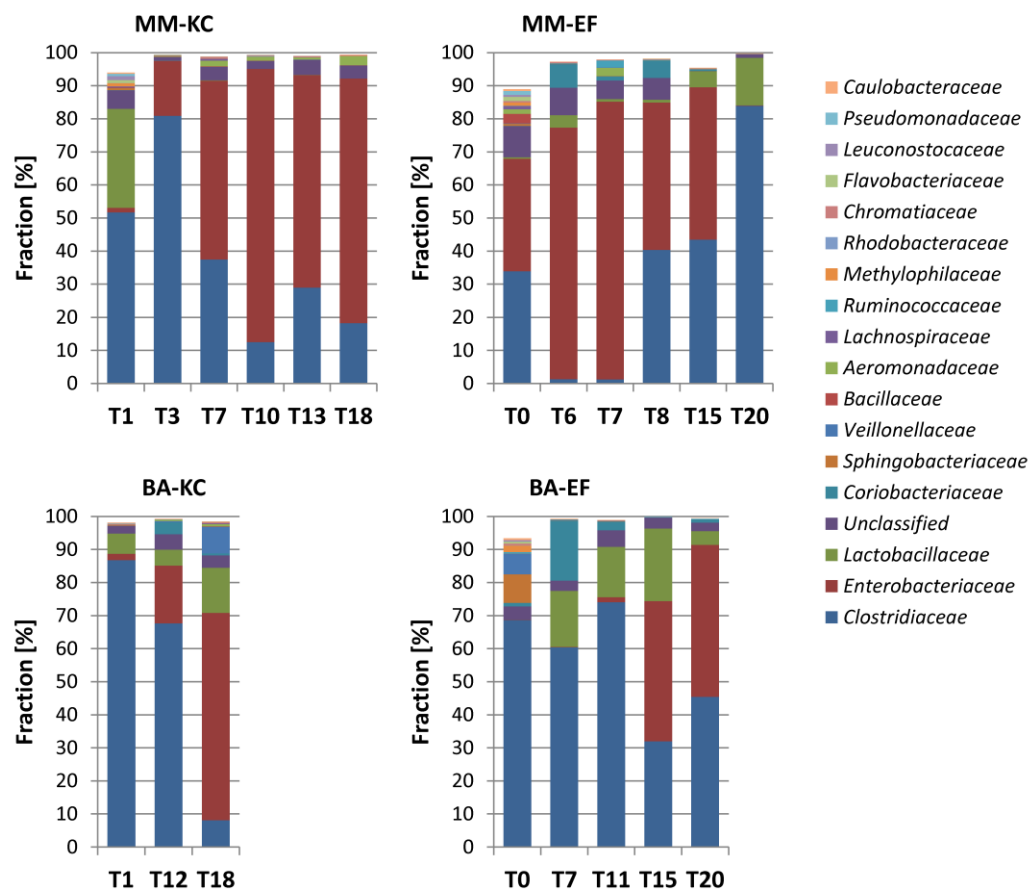

**S3.** Metagenomic classification of the MMC at the family level. Results of batch transfers, during the enrichment of activated sludge. MM-KC = Minimum Medium with Kinetic Control (21h); MM-EF = Minimum Medium with End of Fermentation (72h); BA-KC = Basal Medium with Kinetic Control (21h); BA-EF = Basal Medium with End of Fermentation (72h). T0-T20 = Transfer numbers. Families appearing at frequencies below 1% in all samples were omitted.

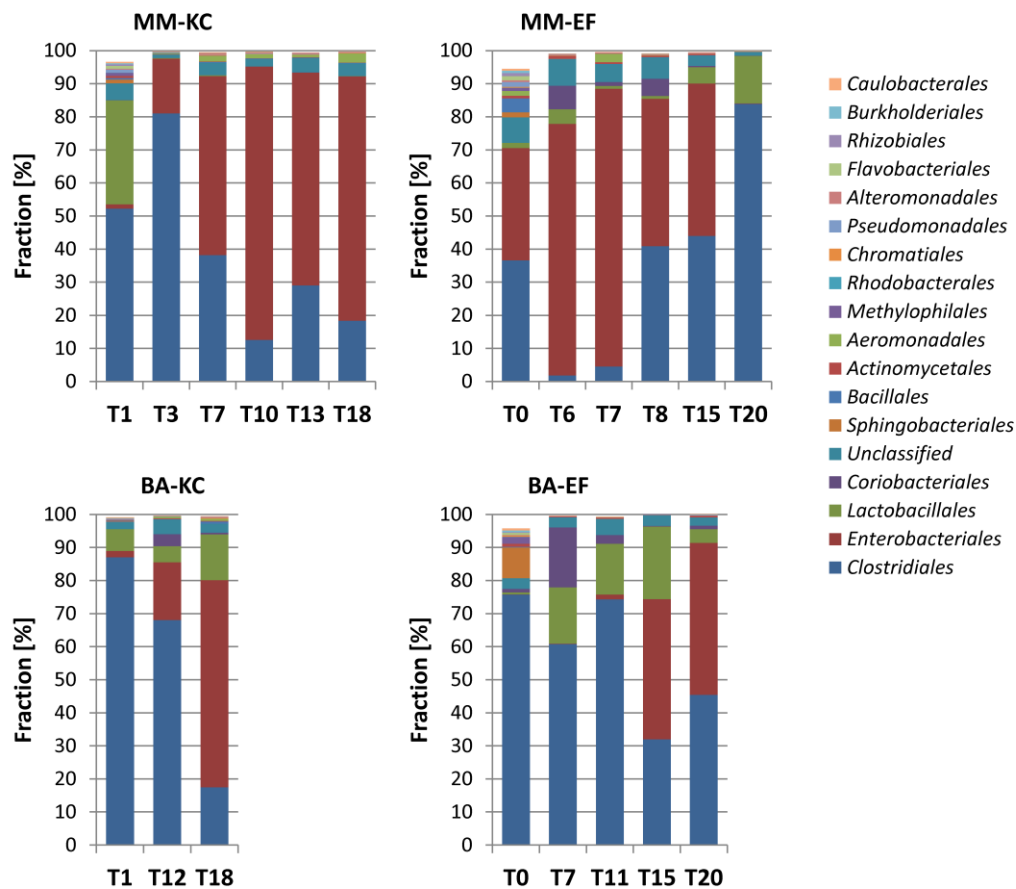

29

30 **S4.** Metagenomic classification of the MMC at the order level. Results of batch transfers, during the enrichment of  
 31 activated sludge. MM-KC = Minimum Medium with Kinetic Control (21h); MM-EF = Minimum Medium with End of  
 32 Fermentation (72h); BA-KC = Basal Medium with Kinetic Control (21h); BA-EF = Basal Medium with End of  
 33 Fermentation (72h). T0-T20 = Transfer numbers. Orders appearing at frequencies below 1% in all samples were  
 34 omitted.

35

36

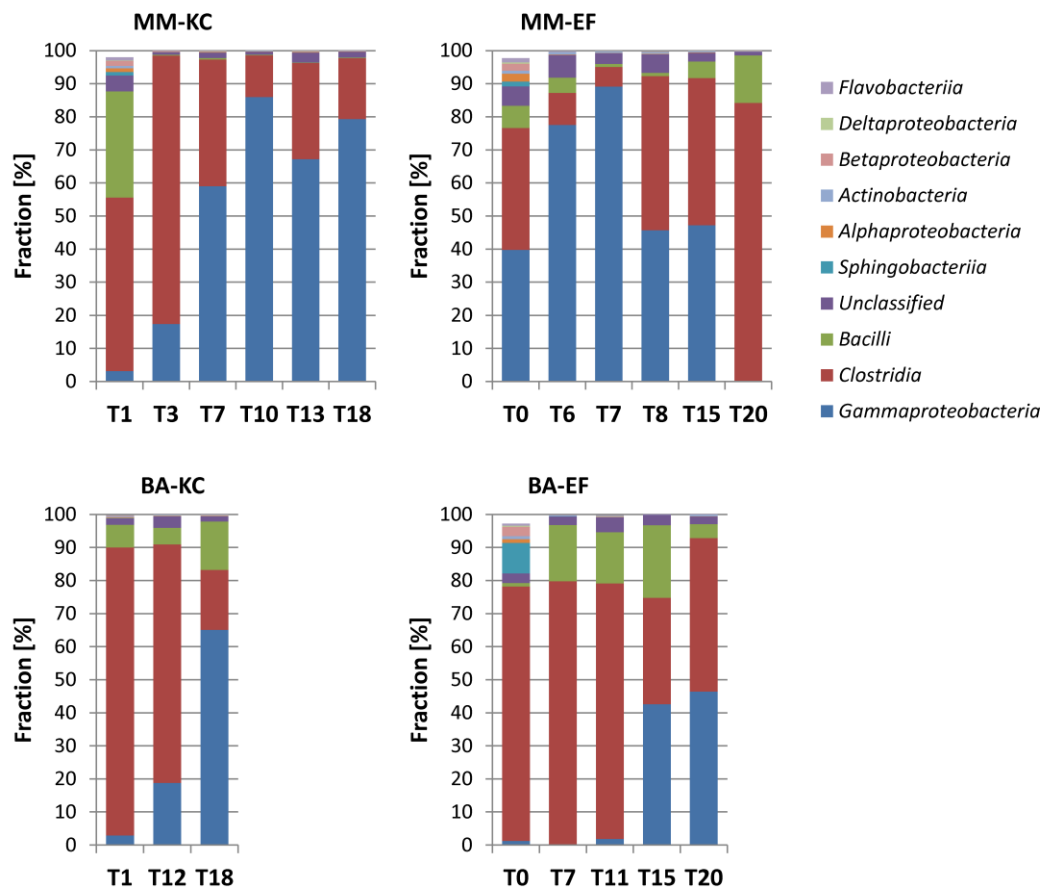

37

38 **S5.** Metagenomic classification of the MMC at the class level. Results of batch transfers, during the enrichment of  
 39 activated sludge. MM-KC = Minimum Medium with Kinetic Control (21h); MM-EF = Minimum Medium with End of  
 40 Fermentation (72h); BA-KC = Basal Medium with Kinetic Control (21h); BA-EF = Basal Medium with End of  
 41 Fermentation (72h). T0-T20 = Transfer numbers. Classes appearing at frequencies below 1% in all samples were  
 42 omitted.

43

44

45

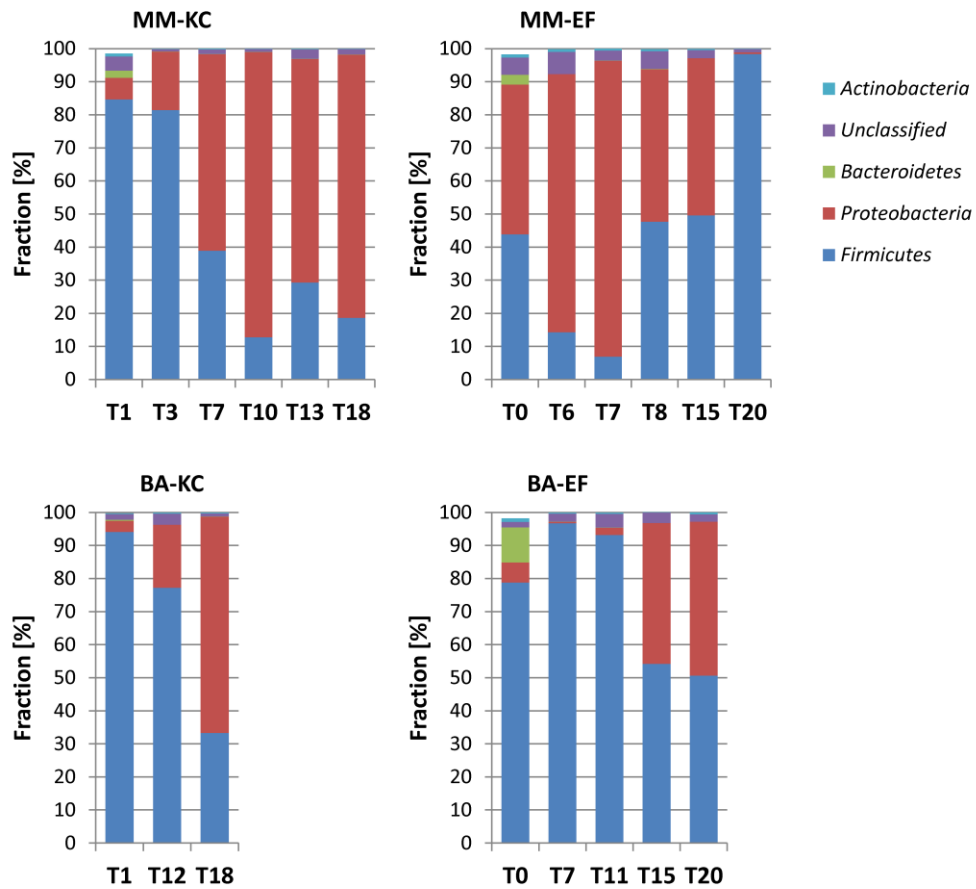

46

47 **S6.** Metagenomic classification of the MMC at the phylum level. Results of batch transfers, during the enrichment of  
 48 activated sludge. MM-KC = Minimum Medium with Kinetic Control (21h); MM-EF = Minimum Medium with End of  
 49 Fermentation (72h); BA-KC = Basal Medium with Kinetic Control (21h); BA-EF = Basal Medium with End of  
 50 Fermentation (72h). T0-T20 = Transfer numbers. Phyla appearing at frequencies below 1% in all samples were  
 51 omitted.

52

53

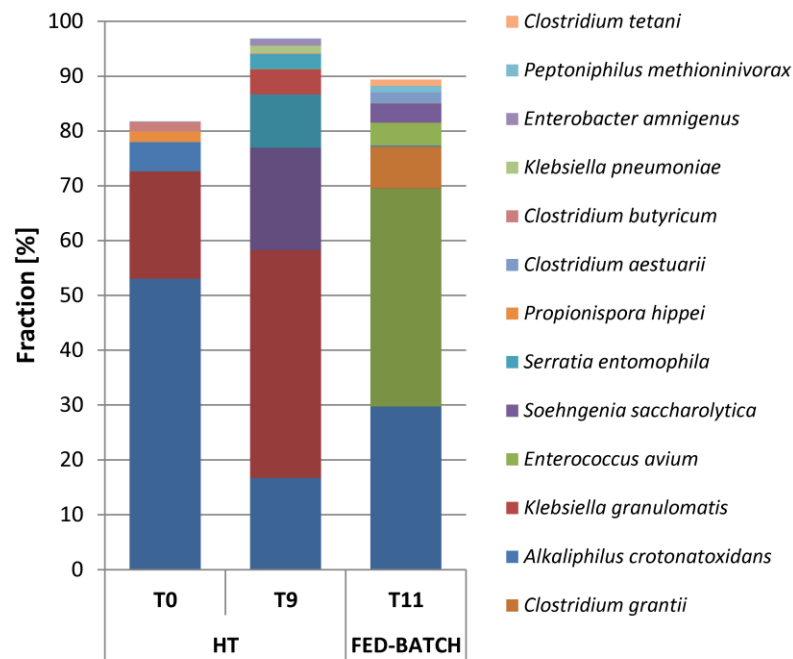

54

55 **S7.** Metagenomic classification of the MMC, at the species level, for the anaerobic sludge enriched on hexane-  
56 pretreated crude glycerol in batch tests (HT) and with the untreated crude glycerol in fed-batch. T0-T11= Transfer  
57 numbers. Species appearing at frequencies below 1% in all samples were omitted.

58

59  
60

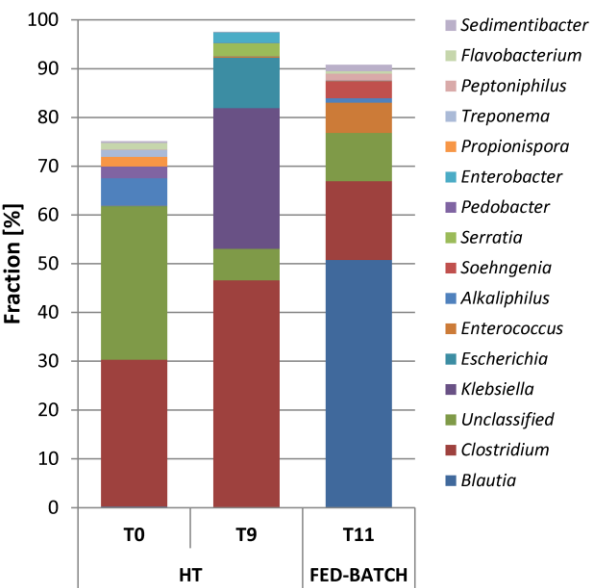

61  
62  
63  
64  
65  
66  
67  
68  
69

**S8.** Metagenomic classification of the MMC, at the genus level, for the anaerobic sludge enriched on hexane-pretreated crude glycerol in batch tests (HT) and with the untreated crude glycerol in fed-batch. T0-T11= Transfer numbers. Species appearing at frequencies below 1% in all samples were omitted.



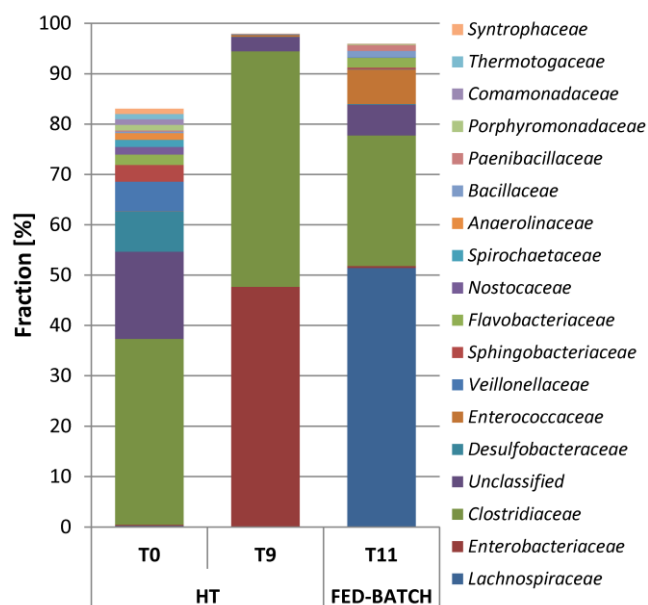

**S9.** Metagenomic classification of the MMC, at the family level, for the anaerobic sludge enriched on hexane-pretreated crude glycerol in batch tests (HT) and with the untreated crude glycerol in fed-batch. T0-T11= Transfer numbers. Families appearing at frequencies below 1% in all samples were omitted.

77

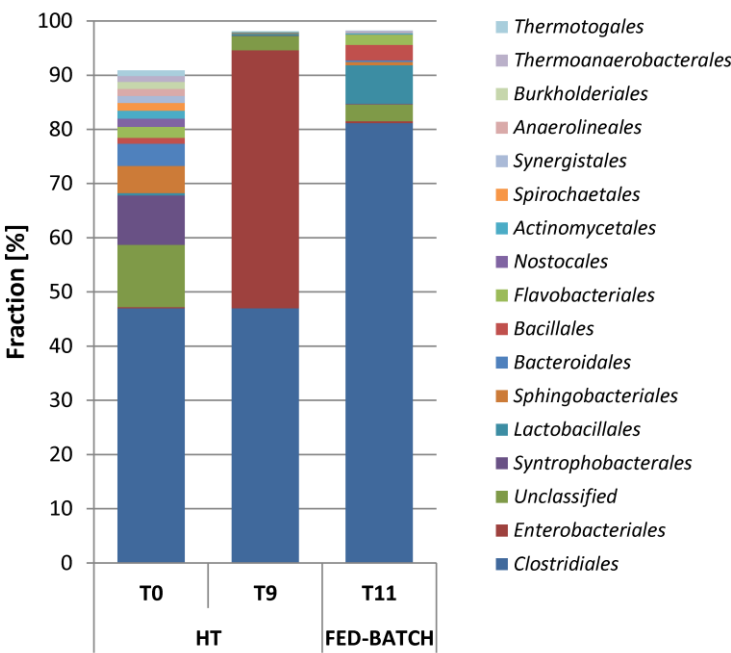

78

79 **S10.** Metagenomic classification of the MMC, at the order level, for the anaerobic sludge enriched on hexane-  
80 pretreated crude glycerol in batch tests (HT) and with the untreated crude glycerol in fed-batch. T0-T11= Transfer  
81 numbers. Orders appearing at frequencies below 1% in all samples were omitted.

82

83

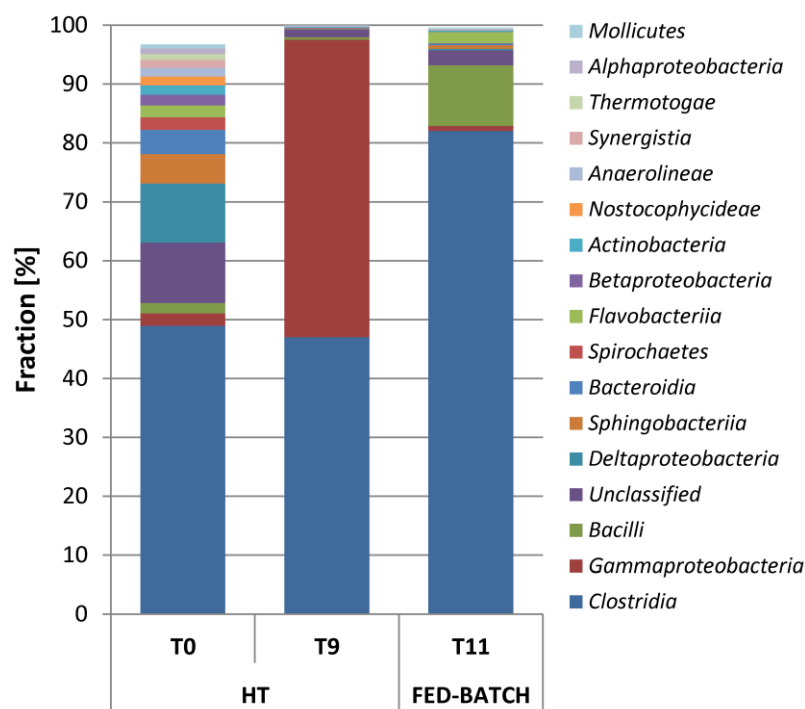

84

85 **S11.** Metagenomic classification of the MMC, at the class level, for the anaerobic sludge enriched on hexane-pretreated  
86 crude glycerol in batch tests (HT) and with the untreated crude glycerol in fed-batch. T0-T11= Transfer numbers.  
87 Classes appearing at frequencies below 1% in all samples were omitted.

88

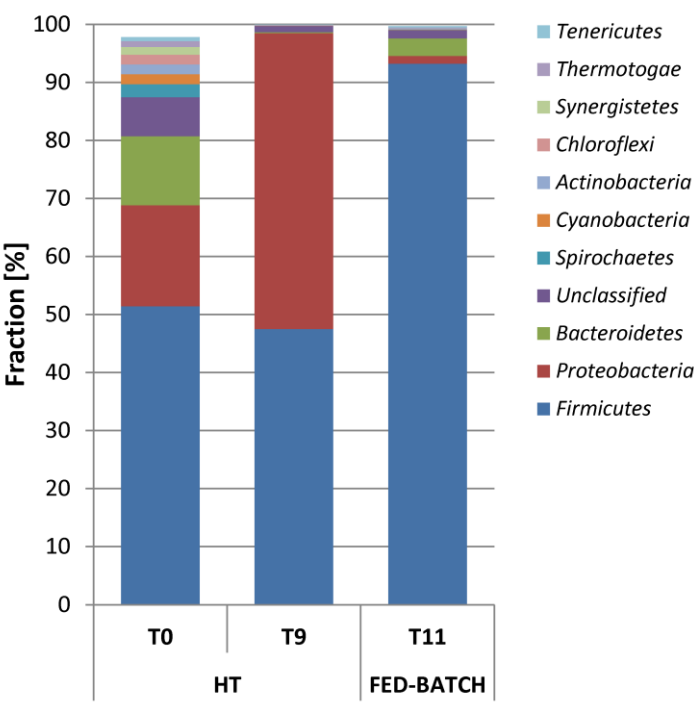

91 **S12.** Metagenomic classification of the MMC, at the phylum level, for the anaerobic sludge enriched on hexane-  
92 pretreated crude glycerol in batch tests (HT) and with the untreated crude glycerol in fed-batch. T0-T11= Transfer  
93 numbers. Phyla appearing at frequencies below 1% in all samples were omitted.
